# Supplementary material for: Simultaneous detection of duplex DNA oligonucleotides using a SERS-based micro-network gradient chip
Source: Royal Society of Chemistry journal article supplement (doi:10.1039/c2lc40890b), 2012-01-01
Supplement: c2lc40890b.pdf [file c2lc40890b.pdf]

## Supporting Information

# Simultaneous detection of duplex DNA oligonucleotides using a SERS-based micro-network gradient chip

Namhyun Choi,<sup>†a</sup> Kangsun Lee,<sup>†b</sup> Dong Woo Lim,<sup>a</sup>

Eun Kyu Lee,<sup>c</sup> Soo-Ik Chang,<sup>d</sup> Kwang W. Oh<sup>\*b</sup> and Jaebum Choo<sup>\*a</sup>

<sup>a</sup>*Department of Bionano Engineering, Hanyang University, Ansan 426-791, South Korea.*

*E-mail: [jbchoo@hanyang.ac.kr](mailto:jbchoo@hanyang.ac.kr)*

<sup>b</sup>*Department of Electrical Engineering, State University of New York at Buffalo, NY 14260,*

*USA. E-mail: [kwangoh@buffalo.edu](mailto:kwangoh@buffalo.edu)*

<sup>c</sup>*College of Bionano Technology, Gachon University, Sungnam 461-701, South Korea*

<sup>d</sup>*Department of Biochemistry, Chungbuk National University, Cheongju 361-763,  
South Korea*

<sup>b</sup>*Department of Electrical Engineering, State University of New York at Buffalo, NY 14260,*

*USA. E-mail: [kwangoh@buffalo.edu](mailto:kwangoh@buffalo.edu)*

**†Joint first authors**

**\*Joint corresponding authors**

**Address for correspondence:**

**Jaebum Choo**

Telephone: +82-31-400-5201; Fax: +82-31-436-8188; E-mail: [jbchoo@hanyang.ac.kr](mailto:jbchoo@hanyang.ac.kr)

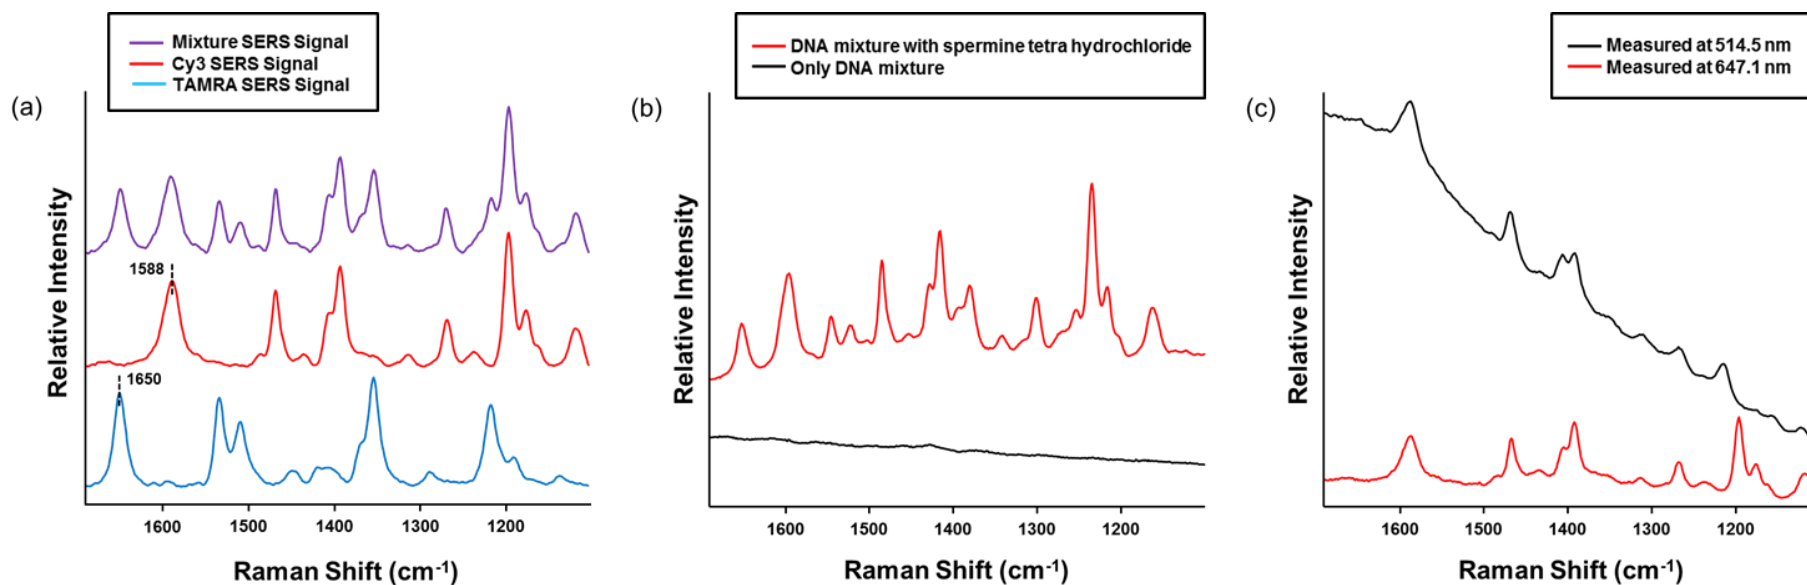

Figure S1. (a) Confocal SERS spectra of  $2 \times 10^{-6}$  M Cy3-labeled *BRAC1*-mutation (bottom),  $10^{-6}$  M TAMRA-labeled *BRAC1*-wild (middle), and their 1:1 mixture (top) adsorbed on silver nanoparticles in a PDMS channel. (a) Confocal SERS spectra of DNA mixture (bottom) and DNA mixture with spermine tetra hydrochloride (top). (c) Wavelength dependence on the SERS spectra of  $10^{-6}$  M TAMRA-labeled *BRAC1*-wild measured at 647.1 nm (bottom) and at 514.5 nm (top).

Figure S1
